# Supplementary material
Source: publisher figshare collection journal article supplement (https://frontiersin.figshare.com/ndownloader/files/14036618)
Supplement: Supplementary file [file 14036618]

**Supplemental table 1.** Differential scanning calorimetry was used to determine melting temperatures for the V<sub>H</sub> and C<sub>H</sub>2 and C<sub>H</sub>3 domains of six UniAbs. The melting temperatures of the UniAb V<sub>H</sub> domains were 61.8 °C on average.

|               | DSC Observed Transition |                      |                      |
|---------------|-------------------------|----------------------|----------------------|
| Identifier    | Tm: V <sub>H</sub>      | Tm: C <sub>H</sub> 2 | Tm: C <sub>H</sub> 3 |
| <b>316274</b> | 59.1                    | 66.3                 | 69.3                 |
| <b>316833</b> | 59.2                    | 64.9                 | 69                   |
| <b>308902</b> | 61.7                    | 65.9                 | 68.9                 |
| <b>316232</b> | 61.8                    | 64.1                 | 67.8                 |
| <b>308912</b> | 61.9                    | 66                   | 68.6                 |
| <b>316829</b> | 66.8                    | 68.1                 | 80.8                 |
